# Supplementary material for: Missed opportunities for guidance on sexually transmitted infection services: a global review of national HIV PrEP guidance
Source: PubMed Central journal article supplement (PMC11347216; doi:10.1136/sextrans-2023-056081), 2024-06-19
Supplement: sextrans-2023-056081supp001.pdf [file sextrans-2023-056081supp001.pdf]

1 **Supplement 1.**

2

3 TABLE S1: List of variables used for data extraction on STIs recommended for people on

4 PrEP. Only those used in the analysis presented are listed.

5

| <b>Information on guidance documents</b>                                                                                                                                                                                                                                                                                                 |
|------------------------------------------------------------------------------------------------------------------------------------------------------------------------------------------------------------------------------------------------------------------------------------------------------------------------------------------|
| WHO Region                                                                                                                                                                                                                                                                                                                               |
| Name of Member State                                                                                                                                                                                                                                                                                                                     |
| Country income level according to the World Bank classification <sup>i</sup>                                                                                                                                                                                                                                                             |
| National HIV guidance (Yes/No)                                                                                                                                                                                                                                                                                                           |
| Name of the HIV guidance document and weblink                                                                                                                                                                                                                                                                                            |
| Date of most recent national HIV guidance document                                                                                                                                                                                                                                                                                       |
| HIV guidance document includes information on PrEP (Yes/No)                                                                                                                                                                                                                                                                              |
| Stand-alone PrEP guidance available (Yes/No)                                                                                                                                                                                                                                                                                             |
| Name of the most recent national PrEP guidance document and weblink                                                                                                                                                                                                                                                                      |
| Date of most recent PrEP guidance document                                                                                                                                                                                                                                                                                               |
| Types of population eligible for PrEP*: Key populations (i.e., MSM, sex workers, transgender people, people who use drugs and incarcerated individuals), HIV serodiscordant couples, adolescents and young people (boys and girls), none mentioned.                                                                                      |
| Place of STI information: <ul style="list-style-type: none"> <li>- Yes, included in HIV national guidance</li> <li>- Yes, stand-alone PrEP guidance</li> <li>- Yes, mention STI but provides no STI information</li> <li>- Refers reader to other STI guidance in the context of PrEP</li> <li>- No information on STIs found</li> </ul> |
| <b>Recommended interventions</b>                                                                                                                                                                                                                                                                                                         |
| Partner services: any strategy mentioned to reach sexual partners of PrEP users diagnosed with a STI or who presented with signs or symptoms (Yes/No)                                                                                                                                                                                    |
| Types of STI case management: syndromic only, syndromic + syphilis testing, etiologic only, both (etiologic plus syndromic)                                                                                                                                                                                                              |
| Syphilis testing at baseline (Yes/No)                                                                                                                                                                                                                                                                                                    |
| Syphilis testing frequency                                                                                                                                                                                                                                                                                                               |
| Types of syphilis test: treponemal, non-treponemal, both, order of tests, rapid tests and types of rapid tests                                                                                                                                                                                                                           |
| Syphilis treatment (Yes/No)                                                                                                                                                                                                                                                                                                              |
| Gonorrhoea testing at baseline (Yes/No)                                                                                                                                                                                                                                                                                                  |
| Anatomical site of sample collection: oropharyngeal, anorectum, urethral, vulvovaginal                                                                                                                                                                                                                                                   |
| Gonorrhoea testing frequency                                                                                                                                                                                                                                                                                                             |
| Types of gonorrhoea test (molecular, culture, microscopy, others)                                                                                                                                                                                                                                                                        |
| Treatment for gonorrhoea (Yes/No)                                                                                                                                                                                                                                                                                                        |
| Antimicrobial resistance (Yes/No)                                                                                                                                                                                                                                                                                                        |
| Chlamydia testing at baseline (Yes/No)                                                                                                                                                                                                                                                                                                   |

|                                                                                          |
|------------------------------------------------------------------------------------------|
| Anatomical site of sample collection: oropharyngeal, anorectum, urethral, vulvovaginal   |
| Chlamydia testing frequency                                                              |
| Types of chlamydia test (molecular, rapid tests, others)                                 |
| Treatment for chlamydia (Yes/No)                                                         |
| Hepatitis B baseline testing (HbsAg**) (Yes/No)                                          |
| Hepatitis B vaccination and circumstance (e.g., HbsAg* negative, prior vaccination, any) |
| Human papilloma virus (HPV) vaccination (Yes/No)                                         |
| HPV molecular testing (Yes/No)                                                           |
| Screening for pre-cancerous cells** (Yes/No)                                             |
| Other STIs* (Yes/No)                                                                     |
| Notes to support interpretation of data analysis                                         |

6 Notes: \*Hepatitis B surface antigen.: \*\* Results not presented;

7

8

<sup>i</sup> Income level according to the World Bank: # <http://databank.worldbank.org/data/download/site-content/CLASS.xlsx>
